# Supplementary material
Source: PubMed Central journal article supplement (PMC2836085)

**Supplemental Fig. 1:** Endocytosis and targeting to recycling endosomes can be transferred to TASK3 channel by transferring the C-ter of TWIK1. We constructed a TASK3/TWIK1 chimera of TASK3 in which the cytoplasmic C-ter tail has been replaced with the equivalent region of TWIK1 (TASK3CtTWIK1). A HA-tag was added in the M3P2 extracellular loop for cell surface detection. We also constructed a similar chimera containing the I293,294A double mutation (TASK3CtTWIK1I293,294A). *A*, Immunostaining of TWIK1, TASK3 and chimeric channels. *B*, Quantification of the amount of each construct present at the cell surface. Live cells or fixed and permeabilized cells expressing the indicated constructs were incubated in the presence of HA antibody for labeling surface channels and total channels, respectively. Surface expression is shown as the ratio of (surface)/(total) (n=4).

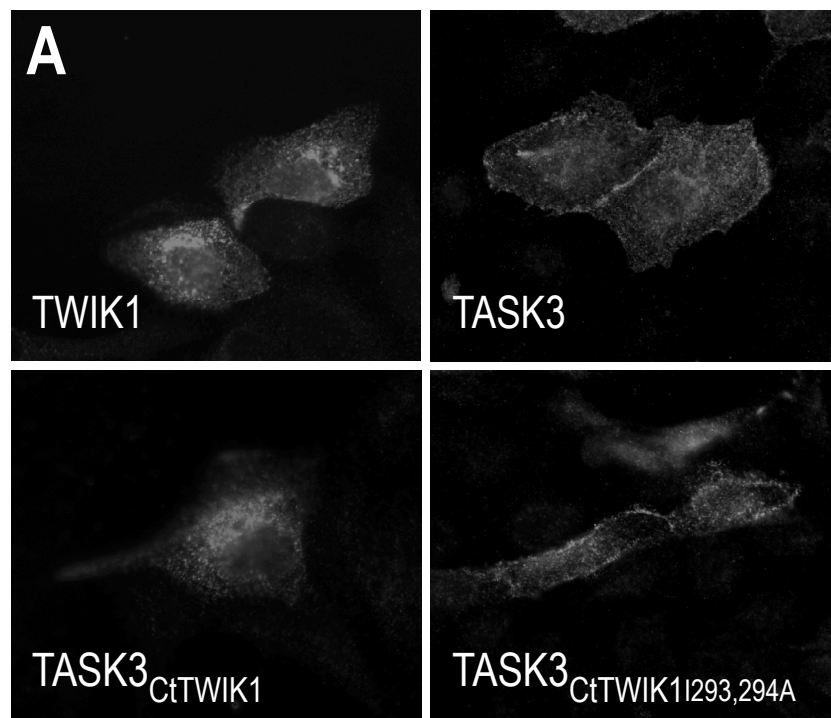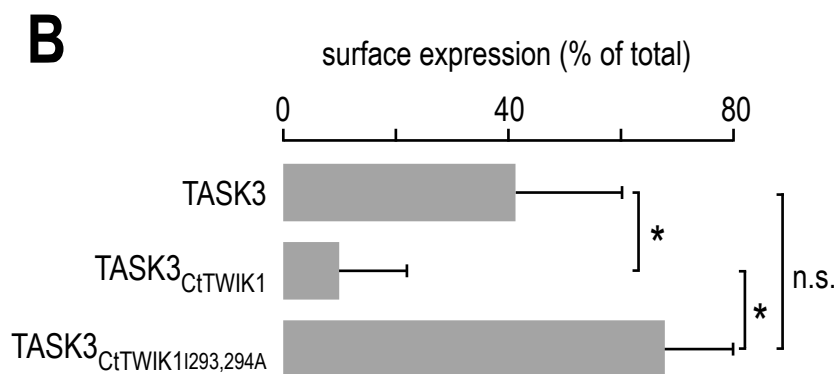

Supplement: supp_M109.078535_jbc.M109.078535-1.pdf [file supp_M109.078535_jbc.M109.078535-1.pdf]
